# Supplementary material for: The Climate and Nutritional Impact of Beef in Different Dietary Patterns in Denmark
Source: MDPI journal article supplement (doi:10.3390/foods9091176), 2020-08-25
Supplement: s1 [file s1]

**Table S1.** Estimated share of origin for food consumed in Denmark based on country/region of import.

| Type of Food       | Danish % | Imported foods distributed on country of import, % <sup>1)</sup> |         |                             |    |                       |             |       |                  |            |               |        |                  |                 | Reference, Danish % |
|--------------------|----------|------------------------------------------------------------------|---------|-----------------------------|----|-----------------------|-------------|-------|------------------|------------|---------------|--------|------------------|-----------------|---------------------|
|                    |          | Sweden and Norway                                                | Germany | The Netherlands and Belgium | UK | Italy/Southern Europe | New Zealand | China | Greenland/Island | Canada/USA | South America | Poland | Malaysia og Asia | Russia/ Baltics |                     |
| Milk and dairy     | 84-90    | 13                                                               | 50      | 12                          | 13 | 8                     | 2           | 0     | 0                | 0          | 0             | 3      | 0                | 0               | 2+3)                |
| Cheese             | 81       | 13                                                               | 50      | 12                          | 13 | 8                     | 2           | 0     | 0                | 0          | 0             | 3      | 0                | 0               | 2)                  |
| Flour (and grains) | 50-87    | 21                                                               | 29      | 8                           | 0  | 9                     | 0           | 0     | 0                | 0          | 0             | 13     | 0                | 21              | 4)                  |
| Bread              | 62-84    | 17                                                               | 40      | 18                          | 6  | 16                    | 0           | 0     | 0                | 0          | 0             | 4      | 0                | 0               | 4)                  |
| Vegetables         | 45-90    | 5                                                                | 33      | 31                          | 0  | 27                    | 0           | 1     | 0                | 0          | 0             | 3      | 0                | 0               | 5)                  |
| Fruits             | 0-30     | 4                                                                | 31      | 25                          | 3  | 30                    | 0           | 0     | 0                | 2          | 0             | 4      | 0                | 0               | 5)                  |
| Pork               | 91       | 4                                                                | 67      | 8                           | 0  | 9                     | 0           | 1     | 0                | 0          | 0             | 11     | 0                | 0               | 3)                  |
| Fish and sea food  | 58       | 41                                                               | 7       | 0                           | 4  | 0                     | 0           | 1     | 29               | 14         | 0             | 3      | 0                | 0               | 3)                  |
| Beef               | 60       | 0                                                                | 31      | 33                          | 13 | 11                    | 1           | 0     | 0                | 0          | 0             | 9      | 0                | 2               | 1)                  |
| Poultry            | 63       | 27                                                               | 45      | 13                          | 3  | 5                     | 0           | 0     | 0                | 0          | 0             | 5      | 0                | 2               | 3)                  |
| Egg                | 62       | 23                                                               | 22      | 34                          | 1  | 0                     | 0           | 0     | 0                | 4          | 1             | 7      | 0                | 7               | 2)                  |
| Oils and fats      | 0-49     | 14                                                               | 43      | 6                           | 0  | 7                     | 0           | 0     | 0                | 0          | 0             | 0      | 30               | 0               | 6)                  |
| Sugar              | 76       | 20                                                               | 32      | 21                          | 4  | 20                    | 0           | 0     | 0                | 0          | 0             | 5      | 0                | 0               | 3)                  |
| Coffee and spices  | 0        | 23                                                               | 30      | 8                           | 8  | 6                     | 0           | 0     | 0                | 0          | 19            | 3      | 4                | 0               |                     |

- 1) Danish Agricultural and Food Council 2017b [31]. Country of import is not necessarily always the country of origin, however this was assumed here.
- 2) Danish Agricultural and Food Council. 2009 [32]. Data from 2008. (Butter: 49% Danish)
- 3) FAOSTat data from 2013-14 [33].
- 4) FAOSTat data [79]. Data for wheat and wheat products: 87% Danish, but the share is lower for Danish grain for bread – 50-80% assumed.
- 5) Vegetable Market Seasonal Guide [34]: Carrots 87%, potatoes 90%, onions 80%, tomatoes 46%, cucumbers 50%, peas 75%, lettuce 50%, apple and pears 19%, strawberry 30%, oranges and bananas 0%.
- 6) Rapeseed oil 47%, butter 49%, olive oil and other 0%.

**Table S2.** Typical routes of transport for imported feed and related greenhouse gas (GHG) emission per kg food from transport to Denmark.

| Import Country  | Distance <sup>1)</sup> | Means of Transport                            | GHG Emission, CO <sub>2</sub> eq g/kg Food <sup>2)</sup> |
|-----------------|------------------------|-----------------------------------------------|----------------------------------------------------------|
| Sweden          | 300 km                 | Truck (Linköping-Göteborg)                    | 55                                                       |
|                 | 278 km                 | Ship (Göteborg-Århus)                         |                                                          |
| Germany         | 650 km                 | Truck (Kassel-Århus)                          | 78                                                       |
| The Netherlands | 100 km                 | Truck (to Amsterdam)                          | 65                                                       |
|                 | 1015 km                | Ship (Amsterdam-Århus)                        |                                                          |
| France          | 450 km                 | Truck (to Le Havre)                           | 117                                                      |
|                 | 1430 km                | Ship (Le Havre-Århus)                         |                                                          |
| Spain           | 450 km                 | Truck (to Gijón)                              | 154                                                      |
|                 | 2335 km                | Ship (Gijón-Århus)                            |                                                          |
| Italy           | 250 km                 | Truck (to Naples)                             | 256                                                      |
|                 | 5310 km                | Ship (Naples-Århus)                           |                                                          |
| Poland          | 340 km                 | Truck (to Gdansk)                             | 76                                                       |
|                 | 702 km                 | Ship (Gdansk-Århus)                           |                                                          |
| Russia          | 500 km                 | Truck                                         | 160                                                      |
|                 | 1000 km                | Train (to Riga)                               |                                                          |
|                 | 1085 km                | Ship (Riga-Århus)                             |                                                          |
| USA             | 600 km                 | Truck                                         | 251                                                      |
|                 | 1300 km                | Train (to Norfolk)                            |                                                          |
|                 | 6569 km                | Ship (Norfolk-Rotterdam)                      |                                                          |
|                 | 1082 km                | Ship (Rotterdam-Århus)                        |                                                          |
| Argentina       | 700 km                 | Truck (to Buenos Aires)                       | 257                                                      |
|                 | 11744 km               | Ship (Buenos Aires-Rotterdam)                 |                                                          |
|                 | 1082 km                | Ship (Rotterdam-Århus)                        |                                                          |
| Brazil          | 1200 km                | Truck (to Santos)                             | 288                                                      |
|                 | 10056 km               | Ship (Santos-Rotterdam)                       |                                                          |
|                 | 1082 km                | Ship (Rotterdam-Århus)                        |                                                          |
| Indonesia       | 900 km                 | Truck (to Balikpapan)                         | 337                                                      |
|                 | 17229 km               | Ship (Balikpapan-Rotterdam)                   |                                                          |
|                 | 1082 km                | Ship (Rotterdam-Århus)                        |                                                          |
| Malaysia        | 400 km                 | Truck (til Miri)                              | 323                                                      |
|                 | 16536 km               | Ship (Miri-Rotterdam)                         |                                                          |
|                 | 880 km                 | Truck (Rotterdam-Århus via Fyn) <sup>1)</sup> |                                                          |
| Australia       | 500 km                 | Truck to Perth                                | 303                                                      |
|                 | 17733 km               | Ship (Perth-Rotterdam)                        |                                                          |
|                 | 1082 km                | Ship (Rotterdam-Århus)                        |                                                          |

1) Calculated by means of <http://www.sea-distances.org> and <https://www.google.dk/maps> from import country to harbor of Aarhus, Denmark

2) GHG from transport regarding import : Ship transport: national 45 g CO<sub>2</sub>/tkm, European: 41 g CO<sub>2</sub>/tkm, overseas: 11 g CO<sub>2</sub>/tkm (Agri-footprint, 2015 [35]); by train in Europe: 52 g CO<sub>2</sub>/tkm and train in the rest of the world: 47 g CO<sub>2</sub>/tkm (Ecoinvent3, 2013 [36]); transport by truck from 100-370 g CO<sub>2</sub>/tkm depending on truck size (Agri-footprint, 2015 [35]).

**Table S3.** Estimate for greenhouse gas (GHG) emission related to storage in supermarket and home.

| Type of storage in Supermarket and Home | GHG Emission, g CO <sub>2</sub> eq/kg Food | Type of Storage Used per Food Group   |
|-----------------------------------------|--------------------------------------------|---------------------------------------|
| 100% dry <sup>1)</sup>                  | <b>60</b>                                  | Coffee, sugar, rice, pasta            |
| 80% dry and 20% cold                    | 68                                         | Fruit, potatoes, soft drink, alcohol, |
| 100% cold                               | <b>100</b>                                 | Dairy products, eggs,                 |
| 80% dry and 20% frozen                  | 143                                        | Bread, bakery                         |
| 60% dry, 20% cold, 20% frozen           | 151                                        | Vegetables, legumes, berries          |
| 80% cold and 20% frozen                 | 175                                        | Meat, fish                            |
| 100% frozen                             | <b>475</b>                                 | Dessert (mainly ice cream)            |

1) Mainly general energy use in supermarket.

**Table S4.** Energy use for cooking, weight loss during cooking and greenhouse gas (GHG) emission from food preparation for different types of beef products.

| Type          | Cooking                    | Recipe                      | Time                 | Cooking-Loss<br>1), % | GHG Emission<br>2), CO <sub>2</sub> eq. g/kg | Reference |
|---------------|----------------------------|-----------------------------|----------------------|-----------------------|----------------------------------------------|-----------|
| <b>Minced</b> | Fried on pan <sup>3)</sup> | Minced meat                 | 12 min <sup>4)</sup> | 28-29                 | 409                                          | 1)        |
|               | Cooked in stew             | 700 g of beef <sup>8)</sup> | 25 min               | (20)                  | 370                                          | 5)        |
|               | Baked in oven              | 1 kg meat                   | 45-50 min            | (20)                  | 534                                          | estimate  |
|               | Average applied            |                             |                      |                       | 410                                          | 6)        |
| <b>Roast</b>  | In oven                    | 1 kg at 150 degree C        | 60-70 min.           | 15-20                 | 672                                          | 1)        |
|               |                            | 1 kg at 180 degree C        | 60 min               | 20-25                 | 19                                           | 1)        |
|               | Roast in pan               | 1 kg                        | 45 min               | 20-25                 | 341                                          | 1)        |
|               | Average applied            |                             |                      |                       | 490                                          | 7)        |
| <b>Strips</b> | Cooked in stew             | 700 g of beef <sup>8)</sup> | 25 min               | (20)                  | 370                                          | 5)        |
| <b>Steaks</b> | Pan <sup>3)</sup>          | 1½-2 cm thickness           | 8 min.               | 15-20                 | 312                                          | 1)        |

1) Institute of Technology (2017 personal communication)[38].

2) 1 kWh electricity = 3.6 MJ out, 172 g CO<sub>2</sub>/MJ electricity (Danish average mix)(Ecoinvent3, 2013 [36]) resulting in 619 g CO<sub>2</sub>/kWh.

3) 500 g at a time.

4) 10 min high temperature – 2 min low temperature, in total 334 W/0.5 kg beef.

5) Thy Mors Energy [39].

6) Assumption: 35% in pan, 50% cooked in stew, 15% in oven.

7) Assumption: 50% in oven and 50% in pan.

8) In total 1.13 kg dish.

**Table S5.** Energy use for cooking and greenhouse gas (GHG) emission from cooking for different types of food items <sup>1)</sup>

| Type of Cooking                   | Example                            | Energy Use       | GHG Emission<br>g CO <sub>2</sub> eq./kg Raw Food |
|-----------------------------------|------------------------------------|------------------|---------------------------------------------------|
| Boiling                           |                                    |                  |                                                   |
| Much water<br>(food: water 1:3)   | 250 g pasta and<br>750 g water     | 1.06 kWh/kg food | 656                                               |
| Medium water<br>(food: water 3:5) | 300 g rice and<br>500 g water      | 0.71 kWh/kg food | 438                                               |
| Little water<br>(food: water 5:1) | 1 kg vegetables and<br>200 g water | 0.32 kWh/kg food | 197                                               |
| Heating water                     |                                    |                  |                                                   |
| Coffee maker                      | 1 kg                               | 0.155 kWh/kg     | 96                                                |
| Electric kettle                   |                                    | 0.119 kWh/kg     | 74                                                |
| Oven                              |                                    |                  |                                                   |
| 1 hour in oven                    | 1 kg food                          | 1 kWh            | 619                                               |
| Baking a cake                     | 25 minutes                         | 0.39 kWh/kg food | 242                                               |

1) Energy use based on Measurement from Thy Mors Energy (2014) [39].

**Table S6.** Avoidable food waste in the chain - from different references and used in this study, % weight loss.

|                            | Retail <sup>2)</sup> |                      | Household  |            |           | Used in This Study    |            |        |            |       |
|----------------------------|----------------------|----------------------|------------|------------|-----------|-----------------------|------------|--------|------------|-------|
| References <sup>1)</sup>   |                      |                      |            |            |           |                       |            |        |            |       |
|                            | PEF, 2017            | Thorsen et al., 2012 | Wrap, 2008 | Wrap, 2014 | PEF, 2017 | Petersen et al., 2015 | Processing | Retail | House hold | Total |
| Milk and dairy products    | 0.5                  | 6                    | 3          | 7          | 7         | (1)                   | 2          | 3      | 3          | 8     |
| Cheese and cheese products | 0.5                  | 6                    | 3          | 7          | 7         | 5                     | 2          | 3      | 3          | 8     |
| Breakfast cereals          | 1                    | 2                    | 15         | 7          | 2         | 3                     | 2          | 2      | 2          | 6     |
| Bread                      | 2                    | 6                    | 31         | 22         | 25        | 14                    | 2          | 6      | 19         | 27    |
| Rice, dry                  | 1                    | 2                    | 15         | 7          | 2         | 9                     | 2          | 2      | 2          | 6     |
| Pasta, dry                 | 1                    | 2                    | 15         | 7          | 2         | 9                     | 2          | 2      | 2          | 6     |
| Vegetables                 | 10                   | 6                    | 19         | 21         | 19        | 14                    | 2          | 6      | 19         | 27    |
| Potatoes                   | 10                   | 6                    | 19         | 21         | 19        | 7                     | 2          | 6      | 19         | 27    |
| Fruit                      | 10                   | 6                    | 26         | 14         | 19        | 6                     | 2          | 6      | 19         | 27    |
| Nuts/almonds               | 1                    | 2                    | 15         | 14         | 2         | 6                     | 2          | 2      | 2          | 6     |
| Juice                      | 1                    | 2                    | 18         | 7          | 5         | 1                     | 2          | 2      | 5          | 9     |
| Meat                       | 4                    | 6                    | 13         | 11         | 11        | 10                    | 2          | 2      | 11         | 15    |
| Fish and fish products     | 4                    | 6                    | 13         | 11         | 11        | 10                    | 2          | 2      | 11         | 15    |
| Egg                        | 1                    | 2                    | 18         | 7          | 2         | 6                     | 2          | 2      | 2          | 6     |
| Dressing                   | 1                    | 2                    | 18         | 13         | 4         | -                     | 2          | 2      | 4          | 8     |
| Fat                        | 1                    | 2                    | 3          | 4          | 4         | 6                     | 2          | 2      | 4          | 8     |
| Sucker                     | 5                    | 2                    | 17         | 7          | 2         | 8                     | 2          | 2      | 2          | 6     |
| Honey and marmalade        | 5                    | 2                    | 17         | 7          | 2         | 8                     | 2          | 2      | 2          | 6     |
| Ice, sweets and chocolate  | 5                    | 2                    | 3          | 7          | 2         | 8                     | 2          | 2      | 2          | 6     |
| Cakes                      | 5                    | 2                    | 17         | 11         | 25        | 8                     | 2          | 6      | 19         | 27    |
| Drinks                     | 1                    | 2                    | 3          | 7          | 5         | -                     | 2          | 2      | 5          | 9     |

- 1) PEF, 2017: Guidance for the development of Product Environmental Footprint Category Rules) [67],  
Thorsen et al., 2012 [68]  
WRAP 2008 [69]  
WRAP 2014 [70]  
Petersen et al., (2015) [71]—for fruits and vegetables numbers from Petersen et al., 2015 was raised with 15 % for including the proportion of waste that was ending as compost, food waste for vegetable upgraded from 12 to 14%, and food waste for fruit upgraded from 5 to 6%.
- 2) Include supermarket and storage at grocery.

**Table S7.** Unavoidable food waste in household—cleaning waste (non-edible) and weight loss at cooking.

| Reference                          | Foodcomp (2014)<br>[74] |         | McCance and<br>Widdowson (2015)<br>[75] | Used in This Study |         |
|------------------------------------|-------------------------|---------|-----------------------------------------|--------------------|---------|
| Weight loss (%)<br>Food group      | Cleaning                | Cooking | Cleaning                                | Cleaning           | Cooking |
| Milk and milk product              | 0                       | 0       |                                         | 0                  | 0       |
| Cheese and cheese product          | 0                       | 0       |                                         | 2                  | 0       |
| <b>Bread and cereals</b>           |                         |         |                                         |                    |         |
| Cereals breakfast                  | 0                       | 0       |                                         | 0                  | 0       |
| Bread                              | 0                       | 0       |                                         | 0                  | 0       |
| <b>Rice and pasta</b>              | 0                       | 0       |                                         | 0                  | 0       |
| <b>Vegetables</b>                  |                         |         |                                         |                    |         |
| Carrots <sup>1)</sup>              | 15                      | 5       | 13-29                                   | 15                 | 5       |
| Pea raw/frozen                     | 60/0                    | 5       | 63/0                                    | 60/0               | 5       |
| Cabbage(white)                     | 20                      | 5       | 9-10                                    | 15                 | 5       |
| Beet root, fresh                   | 20                      | 5       | 20                                      | 20                 | 5       |
| Onion                              | 10                      | 5       | 10                                      | 10                 | 5       |
| Lettuce                            | 5-10                    | 0       | 18                                      | 15                 | 0       |
| Tomato                             | 0                       | 5       | 1                                       | 0                  | 5       |
| Cucumber                           | 5                       | 0       | 8                                       | 8                  | 0       |
| Bell pepper                        | 10                      | 5       | 14                                      | 10                 | 5       |
| Leek                               | 15                      | 5       | 43                                      | 20                 | 5       |
| <b>Potatoes <sup>1)</sup></b>      | 15                      | 5       | 5-15                                    | 15                 | 5       |
| <b>Fruit (not including juice)</b> |                         |         |                                         |                    |         |
| Apple/pear                         | 15                      | 0       | 13                                      | 15                 | 0       |
| Orange                             | 29                      | 0       | 29                                      | 29                 | 0       |
| Banana                             | 40                      | 0       | 47                                      | 40                 | 0       |
| Strawberries                       | 3                       | 5       | 6                                       | 5                  | 5       |
| Nuts/almonds                       | 5                       | 0       | -                                       | 5                  | 0       |
| <b>Juice</b>                       | 0                       | 0       |                                         | 0                  | 0       |
| <b>Meat</b>                        |                         |         |                                         |                    |         |
| Pork                               | 0                       | 25-30   |                                         | 0                  | 20      |
| Beef, minced <sup>2+5)</sup>       | 0                       | 15-29   |                                         | 0                  | 20      |
| Beef, roasted <sup>3+5)</sup>      | 2-15                    | 15-25   |                                         | 2-15               | 20      |
| Beef, steak <sup>5)</sup>          | 1                       | 15-20   |                                         | 1                  | 20      |
| Beef, dice/strips <sup>4)</sup>    | 1                       | 15-20   |                                         | 1                  | 20      |
| Beef, giblets <sup>6)</sup>        | 7                       | 20      |                                         | 7                  | 20      |
| Poultry meat, skin/meat            | 30/42                   | 20/15   |                                         | 30/42              | 20/15   |
| <b>Fish and fish products</b>      |                         |         |                                         |                    |         |
| Herring, fillets/untreated         | 0/35                    | 0/20    |                                         | 0/35               | 0/20    |
| Shrimps, peeled                    | 0                       | 17      |                                         | 0                  | 17      |
| Cod, fillets                       | 0                       | 20      |                                         | 0                  | 20      |
| Flat fish, flounder untreated      | 67                      | 20      |                                         | 67                 | 20      |
| Eggs                               | 11                      | 0       |                                         | 11                 | 0       |
| Dressing                           | 0                       | 0       |                                         | 0                  | 0       |
| Fats (on bread)                    | 0                       | 0       |                                         | 0                  | 0       |
| Fats (other)                       | 0                       | 0       |                                         | 0                  | 0       |
| Sugar                              | 0                       | 0       |                                         | 0                  | 0       |
| Honey and jam                      | 0                       | 0       |                                         | 0                  | 0       |
| Ice-cream, sweets, chocolate       | 0                       | 0       |                                         | 0                  | 0       |
| Cake                               | 0                       | 0       |                                         | 0                  | 0       |
| Fast-food                          | 0                       | 0       |                                         | 0                  | 0       |
| <b>Beverages</b>                   |                         |         |                                         |                    |         |
| Coffee                             | 0                       | 0       |                                         | 0                  | 0       |
| The                                | 0                       | 0       |                                         | 0                  | 0       |
| Alcohol                            | 0                       | 0       |                                         | 0                  | 0       |
| Soft drinks                        | 0                       | 0       |                                         | 0                  | 0       |

1) For new carrots and potatoes freshly harvested, and for old carrots and potatoes from store, respectively.

2) Lean minced meat.

3) Rib-eye (lowest number) and brisket of beef (highest number) respectively.

5) Lean – medium fat content.

- 6) Data from Danish Technological Institute (Bejerholm, DMRI, 2017, pers. Com.) [38].
- 7) Data for calf's liver.



**Table S8.** Carbon footprint (CF) and arable land use (LU) per kg food item appearing in the supermarket and per kg food on the plate, respectively —taking into account food losses in the chain

|                                           | CF, g CO <sub>2</sub> eq. and LU, m <sup>2</sup> ,<br>per kg Food Appearing in Supermarket |                              |                             |                         |          |                                       | CF, g CO <sub>2</sub> eq. and LU m <sup>2</sup> ,<br>per kg Food at the plate |                            |          |                                       | Import,<br>% | Cooked,<br>% | Reference      |
|-------------------------------------------|--------------------------------------------------------------------------------------------|------------------------------|-----------------------------|-------------------------|----------|---------------------------------------|-------------------------------------------------------------------------------|----------------------------|----------|---------------------------------------|--------------|--------------|----------------|
|                                           | Farming<br>processing<br>packing <sup>1)</sup>                                             | Trans-<br>port <sup>2)</sup> | CF<br>Storage <sup>3)</sup> | Losses<br><sup>4)</sup> | Total CF | LU<br>m <sup>2</sup><br><sup>5)</sup> | Cooking <sup>6)</sup>                                                         | CF<br>Losses <sup>7)</sup> | Total CF | LU<br>m <sup>2</sup><br><sup>8)</sup> |              |              |                |
| 1.Mik product                             |                                                                                            |                              |                             |                         |          |                                       |                                                                               |                            |          |                                       |              |              |                |
| Whole milk                                | 1090                                                                                       | 79                           | 100                         | 66                      | 1335     | 1.16                                  | 0                                                                             | 41                         | 1376     | 1.19                                  | 10           | 0            | <sup>9)</sup>  |
| Semi skimmed milk                         | 920                                                                                        | 79                           | 100                         | 57                      | 1156     | 0.98                                  | 0                                                                             | 36                         | 1192     | 1.01                                  | 10           | 0            | <sup>9)</sup>  |
| Skimmed milk                              | 860                                                                                        | 79                           | 100                         | 54                      | 1093     | 0.92                                  | 0                                                                             | 34                         | 1127     | 0.94                                  | 10           | 0            | <sup>9)</sup>  |
| Milk yogurt and other                     | 1200                                                                                       | 79                           | 100                         | 72                      | 1451     | 1.27                                  | 0                                                                             | 45                         | 1496     | 1.31                                  | 10           | 0            | <sup>9)</sup>  |
| 2.Cheese (yellow)                         | 9501                                                                                       | 157                          | 100                         | 507                     | 10265    | 10.41                                 | 0                                                                             | 533                        | 10799    | 10.96                                 | 19           | 0            | <sup>9)</sup>  |
| 3.Cereals and bread                       |                                                                                            |                              |                             |                         |          |                                       |                                                                               |                            |          |                                       |              |              |                |
| Oat flakes                                | 730                                                                                        | 94                           | 60                          | 36                      | 920      | 2.11                                  | 0                                                                             | 19                         | 939      | 2.16                                  | 32           | 0            | <sup>10)</sup> |
| Wheat bread                               | 840                                                                                        | 87                           | 143                         | 92                      | 1161     | 1.34                                  | 0                                                                             | 272                        | 1434     | 1.65                                  | 27           | 0            | <sup>11)</sup> |
| Rye bread                                 | 716                                                                                        | 87                           | 143                         | 81                      | 1027     | 1.41                                  | 0                                                                             | 241                        | 1267     | 1.74                                  | 27           | 0            | <sup>11)</sup> |
| Rice (uncooked)                           | 2900                                                                                       | 141                          | 60                          | 128                     | 3229     | 2.49                                  | 447                                                                           | 74                         | 3751     | 2.54                                  | 100          | 100          | <sup>12)</sup> |
| Pasta (uncooked)                          | 1230                                                                                       | 87                           | 60                          | 57                      | 1433     | 4.57                                  | 669                                                                           | 29                         | 2132     | 4.66                                  | 27           | 100          | <sup>13)</sup> |
| 4.Vegetables                              |                                                                                            |                              |                             |                         |          |                                       |                                                                               |                            |          |                                       |              |              |                |
| Carrots                                   | 142                                                                                        | 58                           | 100                         | 26                      | 326      | 0,31                                  | 178                                                                           | 165                        | 668      | 0.47                                  | 13           | 60           | <sup>14)</sup> |
| Potatoes                                  | 178                                                                                        | 54                           | 100                         | 28                      | 356      | 0.29                                  | 384                                                                           | 196                        | 941      | 0.45                                  | 10           | 100          | <sup>10)</sup> |
| Pea and other                             | 218                                                                                        | 73                           | 151                         | 38                      | 480      | 2.71                                  | 73                                                                            | 112                        | 665      | 3.35                                  | 25           | 30           | <sup>15)</sup> |
| Cabbage                                   | 220                                                                                        | 110                          | 68                          | 34                      | 432      | 0.21                                  | 209                                                                           | 222                        | 863      | 0.31                                  | 55           | 70           | <sup>16)</sup> |
| Beetroot                                  | 379                                                                                        | 42                           | 68                          | 42                      | 531      | 0.33                                  | 290                                                                           | 337                        | 1158     | 0.53                                  | 0            | 90           | <sup>18)</sup> |
| Onion                                     | 379                                                                                        | 67                           | 68                          | 44                      | 558      | 0.33                                  | 271                                                                           | 250                        | 1078     | 0.47                                  | 20           | 95           | <sup>14)</sup> |
| Lettuce                                   | 469                                                                                        | 104                          | 68                          | 55                      | 695      | 0.33                                  | 0                                                                             | 315                        | 1010     | 0.47                                  | 50           | 0            | <sup>16)</sup> |
| Tomatoes                                  | 525                                                                                        | 108                          | 68                          | 60                      | 761      | 0.02                                  | 99                                                                            | 198                        | 1058     | 0.03                                  | 54           | 40           | <sup>16)</sup> |
| Cucumber and other <sup>17)</sup>         | 525                                                                                        | 104                          | 68                          | 60                      | 756      | 0.02                                  | 0                                                                             | 259                        | 1015     | 0.03                                  | 50           | 0            | <sup>16)</sup> |
| 6. Fruit                                  |                                                                                            |                              |                             |                         |          |                                       |                                                                               |                            |          |                                       |              |              |                |
| Orange                                    | 360                                                                                        | 172                          | 68                          | 51                      | 651      | 0.54                                  | 0                                                                             | 481                        | 1133     | 0.94                                  | 100          | 0            | <sup>19)</sup> |
| Banana and other exotic<br><sup>21)</sup> | 400                                                                                        | 172                          | 68                          | 51                      | 695      | 0.54                                  | 0                                                                             | 735                        | 1430     | 1.12                                  | 100          | 0            | <sup>20)</sup> |
| Apple, pear and other <sup>23)</sup>      | 200                                                                                        | 147                          | 68                          | 36                      | 451      | 0.54                                  | 0                                                                             | 204                        | 655      | 0.79                                  | 81           | 0            | <sup>22)</sup> |
| 7. Juice                                  | 740                                                                                        | 172                          | 60                          | 40                      | 1012     | 0.52                                  | 0                                                                             | 53                         | 1065     | 0.55                                  | 100          | 0            | <sup>24)</sup> |
| 8. Meat                                   |                                                                                            |                              |                             |                         |          |                                       |                                                                               |                            |          |                                       |              |              |                |
| Beef                                      | 13030                                                                                      | 140                          | 175                         | 550                     | 13895    | 14.84                                 | 557                                                                           | 5961                       | 20413    | 21.20                                 | 44           | 100          | <sup>25)</sup> |

|                              |       |     |     |     |       |       |     |      |       |       |     |     |     |
|------------------------------|-------|-----|-----|-----|-------|-------|-----|------|-------|-------|-----|-----|-----|
| Pork                         | 4400  | 110 | 175 | 193 | 4879  | 7.71  | 548 | 1973 | 7400  | 10.82 | 9   | 100 | 26) |
| <b>9. Fish</b>               | 4450  | 164 | 175 | 197 | 4986  | 0.00  | 516 | 1605 | 7107  | 0.00  | 42  | 100 | 27) |
| <b>10. Poultry</b>           | 4410  | 132 | 175 | 195 | 4912  | 7.60  | 516 | 1587 | 7035  | 10.05 | 37  | 100 | 28) |
| <b>11. Eggs</b>              | 1958  | 81  | 100 | 88  | 2228  | 3.64  | 226 | 326  | 2780  | 4.18  | 48  | 100 | 10) |
| <b>12. Fats</b>              |       |     |     |     |       |       |     |      |       |       |     |     |     |
| Butter                       | 10470 | 186 | 100 | 443 | 11199 | 11.01 | 0   | 467  | 11666 | 11.46 | 51  | 0   | 9)  |
| Vegetable oil and other      | 2024  | 127 | 68  | 91  | 2310  | 6.74  | 185 | 96   | 2591  | 7.02  | 53  | 90  | 29) |
| <b>13. Sugar and sweet</b>   |       |     |     |     |       |       |     |      |       |       |     |     |     |
| Sugar                        | 571   | 67  | 60  | 29  | 727   | 0.91  | 125 | 15   | 867   | 0.92  | 24  | 50  | 30) |
| Sweet                        | 2383  | 67  | 60  | 104 | 2614  | 3.60  | 0   | 53   | 2667  | 3.68  | 24  | 0   | 31) |
| <b>14. Beverages</b>         |       |     |     |     |       |       |     |      |       |       |     |     |     |
| Beer                         | 1000  | 63  | 68  | 47  | 1177  | 0.52  | 0   | 62   | 1239  | 0.55  | 18  | 0   | 32) |
| Wine                         | 2100  | 218 | 68  | 98  | 2484  | 1.56  | 0   | 131  | 2615  | 1.64  | 100 | 0   | 33) |
| Alcohol, e.g. whiskey        | 2967  | 130 | 68  | 131 | 3296  | 1.56  | 0   | 173  | 3469  | 1.64  | 50  | 0   | 34) |
| Lemonade<br>(ready to drink) | 159   | 77  | 68  | 13  | 317   | 0.18  | 0   | 17   | 333   | 0.19  | 20  | 0   | 35) |
| Soft drinks e.g. cola        | 300   | 77  | 68  | 18  | 464   | 0.18  | 0   | 24   | 488   | 0.19  | 20  | 0   | 36) |
| Water (tap)                  | 1     | 0   | 0   | 0   | 1     | 0     | 0   | 0    | 1     | 0     | 0   | 0   | 37) |
| Bottled water                | 101   | 62  | 60  | 9   | 232   | 0     | 0   | 12   | 244   | 0     | 20  | 0   | 37) |
| Coffee (ready to drink)      | 160   | 16  | 60  | 10  | 246   | 0.31  | 101 | 13   | 360   | 0.33  | 100 | 100 | 38) |
| Tea (ready to drink)         | 46    | 5   | 60  | 5   | 116   | 0.08  | 78  | 6    | 200   | 0.09  | 100 | 100 | 39) |

- 1) The reference number given in the column 'Reference' relate to the reference for carbon footprint from farming, processing and packing per 1 kg food item produced.
- 2) CF from transport taking into account the proportion of this food which is imported (column 'import' gives the proportion of each food item assumed imported).
- 3) CF from storage per food group is given in Supplementary Table S3.
- 4) Carbon footprint for farming, processing, transport and storage of the extra amount of food that need to be produced to have 1 kg food appearing in supermarket (the applied % losses in processing and retail per food item given in Supplementary Table S5).
- 5) The reference for LU per food item is as a starting point the same reference used for CF from farming etc—more detail about references hereof given in the text.
- 6) CF of cooking include also energy for cooking of the extra amount of food due to losses – both the unavoidable weight loss from cooking and avoidable loss in household, which was assumed to happen after cooking.
- 7) CF from extra amount of food due to losses in household—more kg needed from supermarket due to this avoidable and unavoidable loss in household.
- 8) LU—taking into account extra amount that need to be produced due to losses in the chain.
- 9) Flysjö, 2012 [40]. CF of milk yoghurt was also used as the estimate for CF of crème fraîche and cream and CF of yellow cheese was used as estimate for CF of all cheese as this type of cheese contribute around 90% of cheese intake.
- 10) Nielsen et al., 2003 [41].
- 11) Nielsen et al., 2003 [41], Werner (2014) [42].
- 12) Kasmprapruet et al. (2009) [43].

- 13) Heusala et al., 2020 [44].
- 14) Halberg et al., 2006 [45].
- 15) Landquist, 2012 [46]. The same CF estimate was used as estimate for beans.
- 16) Davis et al., 2011 [47].
- 17) CF of cucumber was used as a CF estimate for other vegetables: bell pepper, squash, eggplant, mushroom, asparagus, olive, avocado, celery, corn.
- 18) CF for onion was used as an estimate for beetroot.
- 19) Sanjuán et al., 2005 [48].
- 20) Luske, 2010 [49].
- 21) CF of banana was also used as an estimate for CF of other imported fruit; pineapple, kiwi, melon, nectarine, peach, grape.
- 22) Audsley et al., 2009 [50].
- 23) CF of apple and pear was used as an estimate for CF of berry.
- 24) Mordini et al., 2009 [51].
- 25) Mogensen et al. 2015 [52], Mogensen et al. 2016 [22].
- 26) 3.4 kg CO<sub>2</sub>/kg carcass from Nguyen et al., 2011 [53] transformed to 4.25 kg CO<sub>2eq</sub>/kg meat (1.25 as meat conversion factor from carcass to bone-free meat (Hartikainen and Pulkkinen, 2016 [37])).
- 27) For fish was used CF values for filet (Thrane, 2004 [54]) i.e. meat. This estimate was based on an assumed mix of fish intake; 1/3 cod, 1/3 flatfish and 1/3 herring.
- 28) Leinonen et al., 2012 [55].
- 29) As an estimate for CF of vegetable oil was used CF of Danish rapeseed oil (Mogensen et al., 2014 [56]). This CF estimate was also used as an estimate for margarine and mayonnaise.
- 30) Mogensen et al., 2018 [57].
- 31) Intake of sweet is a mixture of cake (45-56% of total amount of sweet across different diets) candy (25-38%) and ice cream (16-19%). As an general CF estimate for sweet was used CF of sweet of 2.5 kg CO<sub>2eq</sub>/kg from SIK (2010) [58].
- 32) Hanssen et al., 2007 [59].
- 33) Ardente et al., 2006 [60].
- 34) Garnett, 2007 [61].
- 35) Based on assumptions; ¼ lemonade (50:50 berry and sugar) and ¾ water.
- 36) Amienyo et al., 2013 [62], Sinclair, 2009 [63]; Röö, 2014 [64].
- 37) Wallman and Nielsen, 2011 [65].
- 38) 45 g coffee beans /l coffee, CF 3.6 kg CO<sub>2eq</sub>/kg beans (Hanssen et al., 2007) [59].
- 39) 13 g tea leaves/l tea, same CF as coffee beans assumed.
